# Supplementary material for: Effects of seed priming with salicylic acid on cuticular wax deposition in sweet sorghum under drought stress
Source: PeerJ journal article supplement (doi:10.7717/peerj.20014), 2025-09-10
Supplement: raw_dataMKT_EO.xlsx [file raw_dataMKT_EO.xlsx]

## Sheet:  indexes in the first year
			wax content								Height								Biomass								Photosynthetic rate								stomatal conductance								intercellular CO2 concentration
			Normal				Drought				Normal				Drought				Normal				Drought				Normal				Drought				Normal				Drought				Normal				Drought
			Repeat 1	Repeat 2	Repeat 3	Repeat 4	Repeat 1	Repeat 2	Repeat 3	Repeat 4	Repeat 1	Repeat 2	Repeat 3	Repeat 4	Repeat 1	Repeat 2	Repeat 3	Repeat 4	Repeat 1	Repeat 2	Repeat 3	Repeat 4	Repeat 1	Repeat 2	Repeat 3	Repeat 4	Repeat 1	Repeat 2	Repeat 3	Repeat 4	Repeat 1	Repeat 2	Repeat 3	Repeat 4	Repeat 1	Repeat 2	Repeat 3	Repeat 4	Repeat 1	Repeat 2	Repeat 3	Repeat 4	Repeat 1	Repeat 2	Repeat 3	Repeat 4	Repeat 1	Repeat 2	Repeat 3
DLS	priming concentration mg/L	0	1.6485	1.70004	1.7128	1.68711	1.77241	1.78567	1.74729	1.76846	49	47	49	48	34	34	38	34	0.937	0.876	0.996	0.939	0.569	0.563	0.569	0.575	15.85	16.35	16.1	16.1	15.45	17.23	16.34	16.34	0.08	0.08	0.08	0.08	0.07	0.07	0.07	0.07	73.3	46.06	59.68	59.68	28.98	17.72	23.35
		50	1.66667	1.76322	1.58304	1.67098	1.73883	1.79363	1.73299	1.75515	45	47	45	43	50	52	54	48	1.598	1.662	1.629	1.61	0.793	0.853	0.897	0.848	20.02	21.91	23.31	21.7467	15.34	14.66	15	15	0.11	0.13	0.19	0.143333	0.08	0.07	0.08	0.0766667	172.79	104.74	175.16	150.897	72.31	73.23	72.77
		100	1.68387	1.76337	1.75253	1.73325	1.92419	1.97091	1.99156	1.96222	55	54	55	56	54	53	54	55	1.697	1.664	1.608	1.615	1.011	0.911	0.968	0.963	22.1	19.18	20.64	20.64	16.27	15.44	17.1	16.27	0.2	0.17	0.18	0.183333	0.08	0.08	0.08	0.08	191.66	196.35	194.01	194.007	52.68	87.25	18.11
		150	1.93878	1.92126	1.89402	1.91802	1.87394	1.93439	2.19785	2.00206	63	64	62	62	56	57	56	55	1.83	1.743	1.96	1.844	1.438	1.454	1.47	1.436	24.03	26.29	27.97	26.0967	24.08	21.36	23.55	22.9967	0.135	0.11	0.16	0.135	0.17	0.17	0.15	0.163333	207.35	125.69	210.19	181.077	141.61	167.15	111.5
		200	1.7437	1.7684	1.70307	1.73839	1.91178	1.91335	1.87545	1.90019	59	60	58	61	58	59	57	58	1.374	1.469	1.33	1.441	0.72	0.811	0.902	0.81	24.755	25.94	23.57	24.755	18.4	17.59	18	17.9967	0.13	0.135	0.14	0.135	0.07	0.06	0.06	0.0633333	131.01	110.8	107.7	116.503	86.78	87.88	87.33
		250	1.76674	1.70006	1.7463	1.7377	1.74538	1.74099	1.77019	1.75219	55	56	54	50	55.3333	55	55	56	0.959	0.864	0.87	0.909	0.717	0.683	0.68	0.632	24.755	25.94	23.57	24.755	18.4	17.59	18	17.9967	0.13	0.135	0.14	0.135	0.07	0.06	0.06	0.0633333	131.01	110.8	107.7	116.503	86.78	87.88	87.33
			Normal				Drought				Normal				Drought				Normal				Drought				Normal				Drought				Normal				Drought				Normal				Drought
			Repeat 1	Repeat 2	Repeat 3	Repeat 4	Repeat 1	Repeat 2	Repeat 3	Repeat 4	Repeat 1	Repeat 2	Repeat 3	Repeat 4	Repeat 1	Repeat 2	Repeat 3	Repeat 4	Repeat 1	Repeat 2	Repeat 3	Repeat 4	Repeat 1	Repeat 2	Repeat 3	Repeat 4	Repeat 1	Repeat 2	Repeat 3	Repeat 4	Repeat 1	Repeat 2	Repeat 3	Repeat 4	Repeat 1	Repeat 2	Repeat 3	Repeat 4	Repeat 1	Repeat 2	Repeat 3	Repeat 4	Repeat 1	Repeat 2	Repeat 3	Repeat 4	Repeat 1	Repeat 2	Repeat 3
ML8000	priming concentration mg/L	0	1.56652	1.49969	1.53875	1.62654	1.62678	1.63855	1.6218	1.55526	56	54	56	55.3333	43	45	42	37	1.797	1.932	1.715	1.743	0.769	0.929	0.832	0.832	22.879	17.771	15.346	21.125	10.532	6.505	11.512	17.15	0.172	0.113	0.095	0.137	0.047	0.028	0.053	0.098	139.229	109.646	106.549	108.923	17.663	11.498	27.852
		50	2.03265	2.09344	2.08186	2.06932	2.12232	2.11097	2.09526	2.10951	50	48	46	50	45	53	53	48	1.603	1.517	1.585	1.568	0.771	0.961	0.886	0.833	15.188	11.468	18.796	16.545	8.065	18.117	10.55	10.608	0.092	0.062	0.109	0.092	0.068	0.088	0.064	0.101	114.518	90.892	94.756	88.705	68.913	81.706	97.56
		100	2.05979	2.2172	2.14929	2.14209	2.48294	2.65385	2.55772	2.56484	46	55	43	53	46	37	43	47	2.674	2.689	2.683	2.759	1.014	0.978	0.95	0.981	17.58	15.986	16.365	15.528	13.286	16.089	14.687	18.376	0.121	0.102	0.131	0.1	0.045	0.119	0.053	0.058	141.519	126.681	96.967	130.053	100.738	131.079	71.026
		150	2.42588	2.05112	2.31331	2.26344	2.89994	3.18265	3.3057	3.12943	53	58	46	35	55	46	53	37	3.044	3.049	3.088	2.924	1.127	1.155	1.128	1.259	21.68	17.849	22.76	20.763	16.532	15.138	13.484	15.571	0.142	0.153	0.151	0.149	0.081	0.076	0.081	0.095	131.608	193.993	131.267	133.657	115.654	115.654	115.812
		200	2.31647	2.37864	1.87245	2.18919	2.96411	2.86762	2.67226	2.83466	33	37	47	44	47	30	30	37	2.614	2.375	2.377	2.455	1.176	1.124	1.073	1.152	9.254	15.591	12.422	12.422	16.917	14.496	15.707	14.998	0.057	0.097	0.145	0.141	0.091	0.087	0.089	0.085	131.797	122.026	113.647	137.013	84.249	116.199	116.558
		250	1.85145	1.55377	1.88686	1.76403	2.03298	1.99152	2.23844	2.08765	41	42	47	29	41	47	39	29	2.415	2.406	2.442	2.397	1.135	1.115	1.114	1.106	12.191	10.979	14.15	10.097	11.196	12.982	13.203	12.461	0.073	0.054	0.083	0.055	0.061	0.073	0.067	0.067	123.529	62.755	113.153	96.008	99.522	103.025	71.855
			Normal				Drought				Normal				Drought				Normal				Drought				Normal				Drought				Normal				Drought				Normal				Drought
			Repeat 1	Repeat 2	Repeat 3	Repeat 4	Repeat 1	Repeat 2	Repeat 3	Repeat 4	Repeat 1	Repeat 2	Repeat 3	Repeat 4	Repeat 1	Repeat 2	Repeat 3	Repeat 4	Repeat 1	Repeat 2	Repeat 3	Repeat 4	Repeat 1	Repeat 2	Repeat 3	Repeat 4	Repeat 1	Repeat 2	Repeat 3	Repeat 4	Repeat 1	Repeat 2	Repeat 3	Repeat 4	Repeat 1	Repeat 2	Repeat 3	Repeat 4	Repeat 1	Repeat 2	Repeat 3	Repeat 4	Repeat 1	Repeat 2	Repeat 3	Repeat 4	Repeat 1	Repeat 2	Repeat 3
P05206	priming concentration mg/L	0	1.68987	1.64166	1.58986	1.64046	2.05943	2.1315	1.93112	2.16267	68	69	69	67	55	53	54	57	2.277	2.733	2.815	2.61	1.317	1.261	1.123	1.229	11.91	10.232	13.815	12.678	1	3.369	2.964	3.008	0.071	0.065	0.078	0.07	0.008	0.016	0.016	0.016	110.256	123.577	81.548	87.966	102.992	61.783	118.579
		50	1.54064	1.58782	1.75098	1.77126	2.05306	1.71461	1.78135	1.89634	71	70	71	70	52	58	57	59	3.229	2.965	2.994	2.832	1.197	1.195	1.144	1.244	8.026	9.805	7.983	8.605	7.461	3.004	2.36	4.735	0.038	0.038	0.035	0.01	0.037	0.02	0.017	0.021	44.72	35.618	26.516	69.057	48.662	36.398	44.06
		100	2.09578	1.72219	1.84767	1.89493	2.03309	2.01131	1.95592	1.95725	75	76	78	76	53	55	52	59	3.277	2.88	2.905	3.038	1.414	1.471	1.412	1.417	8.29	8.211	9.587	7.712	5.168	6.272	5.188	4.044	0.04	0.041	0.057	0.043	0.057	0.028	0.024	0.02	68.715	57.194	79.009	69.941	38.973	29.227	39.439
		150	2.36581	2.36532	2.35847	2.32714	2.75379	2.63535	2.72309	2.90293	69	68	66	68	59	59	63	55	2.541	3.106	2.529	2.651	1.465	1.499	1.596	1.769	10.123	13.333	15.209	12.681	13.611	10.831	12.221	12.221	0.046	0.066	0.082	0.065	0.064	0.049	0.032	0.043	61.302	67.12	78.712	107.712	167.734	157.281	178.187
		200	2.17539	2.11694	2.01222	1.94875	2.35947	2.37094	2.41893	2.43096	65	65	65	66	57	57	60	61	1.965	1.987	1.888	2.109	1.234	1.268	1.227	1.265	6.963	9.833	6.316	6.459	4.014	4.543	4.42	5.194	0.042	0.051	0.032	0.032	0.019	0.033	0.02	0.015	73.097	72.876	76.543	69.872	56.008	51.19	52.316
		250	1.31929	1.39891	1.37409	1.37145	1.9451	2.16836	2.10504	2.26049	47	45	48	49	46	47	42	48	1.221	1.153	1.241	1.27	0.968	0.851	0.896	1.099	7.647	8.305	5.779	8.858	5.017	6.462	5.436	3.154	0.057	0.039	0.03	0.049	0.037	0.032	0.023	0.014	85.285	57.423	87.976	76.895	64.555	67.803	54.312
[truncated: 49 more columns]

## Sheet:  indexes in the second year
				alkane	primary alcohol	aldehyde	α-amyrin	lanosterol	other alcohol	uknown components	total wax	C25alkane	C26alkane	C27alkane	C28alkane	C29alkane	C30alkane	C31alkane	C32alkane	C33alkane	C34alkane	C26alcohol	C27alcohol	C28alcohol	C26aldehyde	C27aldehyde	C28aldehyde	C29aldehyde	C30aldehyde
DLS	Normal	no SA-primed	Repeat 1	0.385548	0.0890589	0.649027	0.0148663	0.048016	0.321271	0.14071	1.6485	2.82249	2.48681	9.74695	2.88974	28.7594	0.387841	27.2538	11.8001	10.9653	2.88765	11.5159	51.0188	37.4653	5.2026	18.053	54.5025	13.7262	8.51563
			Repeat 2	0.438989	0.108612	0.637165	0.0173841	0.0444228	0.296622	0.156847	1.70004	1.28722	0.87534	7.50661	2.7509	30.5761	1.58118	25.3507	14.1613	12.8099	3.10077	10.4722	40.7458	48.7821	3.25715	19.8164	56.2778	12.878	7.77058
			Repeat 3	0.480452	0.0722544	0.608687	0.0160323	0.0456037	0.378845	0.110926	1.7128	1.26327	0.795995	6.62386	4.53524	29.7107	1.94078	27.6825	14.2014	11.0094	2.23686	9.44225	48.4987	42.059	3.43842	18.5545	49.3163	18.8516	9.83917
			Repeat 4	0.434996	0.0899751	0.631626	0.0160942	0.0460142	0.332246	0.136161	1.68711	1.79099	1.38605	7.95914	3.39196	29.6821	1.30327	26.7623	13.3876	11.5948	2.74176	10.4768	46.7544	42.7688	3.96606	18.808	53.3655	15.152	8.70846
		SA-primed	Repeat 1	0.432351	0.317205	0.536377	0.0419852	0.0551104	0.362739	0.193012	1.93878	2.04832	1.05116	6.60877	5.83948	27.4334	1.70821	30.2063	13.6114	9.33536	2.15759	4.44427	65.6762	29.8795	4.1947	20.0222	52.0903	16.3915	7.30135
			Repeat 2	0.458822	0.23769	0.589805	0.0314601	0.0547455	0.358546	0.190196	1.92126	1.54847	0.78765	7.48185	7.06539	27.8202	1.91131	26.6364	12.3287	12.7435	1.67658	4.05956	59.9131	36.0273	4.00291	20.4387	53.2312	15.8442	6.48302
			Repeat 3	0.499297	0.241115	0.596282	0.0281961	0.043638	0.300479	0.185014	1.89402	2.03526	1.17528	7.88577	7.71879	31.3851	1.92986	27.5364	11.4315	7.27178	1.63031	5.55267	64.1129	30.3344	4.06703	24.0563	51.5656	13.937	6.37405
			Repeat 4	0.46349	0.265337	0.574155	0.0338805	0.0511646	0.340588	0.189407	1.91802	1.87735	1.0047	7.32547	6.87455	28.8796	1.84979	28.1263	12.4572	9.78354	1.82149	4.6855	63.2341	32.0804	4.08821	21.5057	52.2957	15.3909	6.71947
	Drought	no SA-primed	Repeat 1	0.544681	0.162637	0.438274	0.0255747	0.0533149	0.363126	0.184801	1.77241	1.12186	0.7762	15.651	3.13868	25.0206	2.02679	25.1312	13.2441	12.5228	1.36685	9.07825	51.1272	39.7946	5.80503	21.6696	49.9613	13.7781	8.78594
			Repeat 2	0.511508	0.131992	0.464162	0.0143785	0.0674605	0.410879	0.185295	1.78567	1.89817	1.08808	7.73553	4.27446	25.451	2.7972	27.1866	14.1	13.1526	2.31645	6.46011	45.138	48.4019	4.40398	19.9551	54.3819	12.9426	8.31646
			Repeat 3	0.50502	0.111316	0.486262	0.0196421	0.0556698	0.382788	0.186593	1.74729	1.16358	0.766927	11.0087	6.211	26.3338	1.56293	24.6253	13.9477	12.5811	1.79905	9.14173	40.9547	49.9036	5.68097	20.592	54.4508	10.877	8.39925
			Repeat 4	0.520403	0.135315	0.462899	0.0198651	0.0588151	0.385597	0.185563	1.76846	1.39454	0.877068	11.4651	4.54138	25.6018	2.12897	25.6477	13.7639	12.7521	1.82745	8.2267	45.7399	46.0334	5.29666	20.7389	52.9313	12.5325	8.50055
		SA-primed	Repeat 1	0.424182	0.196289	0.681956	0.0368749	0.0503472	0.383265	0.101029	1.87394	1.85436	0.974193	9.26794	4.38681	36.3075	1.5005	24.6792	13.6414	4.38609	3.002	4.49884	73.8494	21.6517	4.7678	19.3371	47.7556	17.9423	10.1972
			Repeat 2	0.500184	0.193733	0.593776	0.0301879	0.0466202	0.429647	0.140237	1.93439	1.2414	0.808709	6.39573	2.8159	32.606	1.54081	28.787	16.9307	5.86132	3.01243	4.3949	58.6597	36.9454	3.92102	15.6799	44.4759	26.8134	9.10977
			Repeat 3	0.54091	0.247448	0.653025	0.0385032	0.0822384	0.477053	0.158669	2.19785	1.46171	0.967238	8.68869	4.28612	29.3516	1.32686	26.5756	16.1468	8.2796	2.91576	5.49778	60.4974	34.0048	4.12279	23.327	49.8309	14.5913	8.12798
			Repeat 4	0.488425	0.21249	0.642919	0.0351887	0.0597353	0.429988	0.133312	2.00206	1.51916	0.916713	8.11746	3.82961	32.755	1.45606	26.6806	15.573	6.17567	2.97673	4.79717	64.3355	30.8673	4.27054	19.448	47.3541	19.7823	9.14497
ML8000	Normal	no SA-primed	Repeat 1	0.379873	0.359968	0.52162	0.0135216	0	0.331074	0.0687159	1.67477	1.10856	0.821381	9.18517	6.69837	31.5922	0.858924	24.5726	13.5443	7.69605	3.9224	2.08158	56.0953	41.8232	3.75648	16.0863	50.9202	23.7015	5.53555
			Repeat 2	0.333641	0.418717	0.45218	0.0118684	0	0.321513	0.0752322	1.61315	1.15982	0.850893	9.56353	6.62221	29.6732	0.693983	24.397	13.3848	9.8549	3.79966	5.24448	58.4918	36.2637	3.63631	11.881	42.5803	36.2134	5.68889
			Repeat 3	0.356757	0.389343	0.4869	0.012695	0	0.326294	0.071974	1.64396	1.13419	0.836137	9.37435	6.66029	30.6327	0.776454	24.4848	13.4646	8.77548	3.86103	3.66303	57.2935	39.0434	3.6964	13.9837	46.7502	29.9575	5.61222
			Repeat 4	0.356757	0.389343	0.4869	0.012695	0	0.326294	0.071974	1.64396	1.13419	0.836137	9.37435	6.66029	30.6327	0.776454	24.4848	13.4646	8.77548	3.86103	3.66303	57.2935	39.0434	3.6964	13.9837	46.7502	29.9575	5.61222
		SA-primed	Repeat 1	0.613659	0.355435	0.394378	0.0201892	0	0.365175	0.151486	1.90032	1.13022	2.02942	8.62844	7.94656	25.7788	3.03515	26.4507	12.9543	7.68927	4.35719	7.15239	55.6362	37.2114	11.0426	17.3649	33.1473	33.5996	4.84558
			Repeat 2	0.593946	0.42985	0.359963	0.0350306	0	0.324485	0.138203	1.88148	1.54172	1.79321	18.9285	7.67356	27.5165	2.74091	28.3967	12.523	6.48061	2.70325	10.0388	57.264	32.6972	16.5137	16.5089	31.2686	32.3376	3.37124
			Repeat 3	0.538454	0.399343	0.343679	0.0295144	0	0.42372	0.157694	1.8924	1.73593	1.76755	14.7906	7.0925	28.1962	2.86838	28.6361	15.0533	2.01801	4.41582	7.36886	50.3008	42.3303	10.7433	13.6171	31.4096	38.5174	5.71253
			Repeat 4	0.58202	0.394876	0.366007	0.0282447	0	0.371127	0.149128	1.8914	1.46929	1.86339	14.1159	7.57087	27.1638	2.88148	27.8278	13.5102	5.39596	3.82542	8.18667	54.4003	37.413	12.7666	15.8303	31.9418	34.8182	4.64312
	Drought	no SA-primed	Repeat 1	0.438967	0.188335	0.61177	0.00653067	0	0.347332	0.0834518	1.67639	1.07285	0.797354	7.5491	6.45551	31.7411	0.842055	23.7919	13.1397	8.42709	6.18334	2.72601	50.5911	46.6829	2.81421	19.6339	46.0799	23.2613	8.21069
			Repeat 2	0.561459	0.131499	0.381404	0.00331592	0	0.407567	0.129942	1.61519	1.73436	1.50496	9.24121	5.60121	30.1095	0.779756	22.9649	14.7772	9.316	3.97079	1.51913	49.2169	49.264	5.64515	23.0365	34.5544	30.0751	6.68888
			Repeat 3	0.500213	0.159917	0.496587	0.0049233	0	0.37745	0.106697	1.64579	1.40361	1.15115	8.39515	6.02836	30.9253	0.810905	23.3784	13.9585	8.87155	5.07707	2.12257	49.904	47.9734	4.22968	21.3352	40.3172	26.6682	7.44978
			Repeat 4	0.500213	0.159917	0.496587	0.0049233	0	0.37745	0.106697	1.64579	1.40361	1.15115	8.39515	6.02836	30.9253	0.810905	23.3784	13.9585	8.87155	5.07707	2.12257	49.904	47.9734	4.22968	21.3352	40.3172	26.6682	7.44978
		SA-primed	Repeat 1	0.746681	0.457305	0.456108	0.0203284	0	0.438052	0.158538	2.27701	1.72189	1.65252	18.9285	7.32912	24.8976	3.46831	26.7451	12.1406	8.3909	3.77605	8.48473	49.566	41.9493	15.7964	16.6623	37.6844	23.2554	6.60154
			Repeat 2	0.686157	0.40037	0.419193	0.0153162	0	0.376775	0.175463	2.07327	2.29491	2.36218	14.7906	9.67505	24.7411	4.46535	28.1844	11.435	6.14751	3.03623	9.8671	61.8321	28.3008	10.9059	17.4831	36.6326	32.6321	2.34633
			Repeat 3	0.697935	0.407645	0.460403	0.0172115	0	0.437938	0.211393	2.23253	1.8937	2.8326	19.3777	6.53581	19.733	5.42773	31.1842	12.3925	6.41977	6.77292	8.7246	59.9124	31.363	13.1849	17.4207	32.9907	30.2262	6.17752
			Repeat 4	0.710258	0.421773	0.445235	0.0176187	0	0.417588	0.181798	2.19427	1.97017	2.28243	17.6989	7.84666	23.1239	4.4538	28.7046	11.9894	6.98606	4.5284	9.02548	57.1035	33.871	13.2957	17.1887	35.7692	28.7046	5.04179
P05206	Normal	no SA-primed		0.499027	0.245382	0.761283	0.0425891	0.065051	0.303113	0.152159	1.56958	1.55319	0.771914	17.0663	5.14219	33.7762	2.18005	21.9808	8.88095	5.99612	2.65232	6.364	58.6498	34.9862	7.55306	26.6614	57.5962	3.11261	5.07673
				0.608652	0.402686	0.507627	0.0623344	0.0928711	0.338471	0.164882	1.56887	1.15893	0.595881	23.9638	5.04696	29.9673	1.38519	20.7576	8.5094	5.82153	2.79334	6.9403	51.5075	41.5522	6.65031	24.085	57.8354	6.48873	4.94058
				0.56303	0.368002	0.585488	0.0667319	0.097968	0.357973	0.173834	1.65	1.37981	0.68413	17.3593	4.79608	32.2838	1.3898	21.5102	10.1533	6.74136	3.70218	8.90653	56.7728	34.3207	5.83126	28.4236	53.9653	5.69443	6.0854
				0.556903	0.33869	0.618133	0.0572185	0.0852967	0.333186	0.163625	1.59615	1.36397	0.683975	19.4632	4.99508	32.0091	1.65168	21.4162	9.1812	6.18634	3.04928	7.40361	55.6434	36.953	6.67821	26.39	56.4656	5.09859	5.36757
		SA-primed		0.550932	0.331636	0.841979	0.0296887	0.144737	0.372356	0.214968	1.93537	1.76589	1.57187	12.5451	10.4474	32.435	1.86215	19.6521	8.75202	7.53356	3.43497	3.88156	56.8182	39.3002	7.51469	28.658	54.006	2.84259	6.97871
				0.551245	0.60177	0.425111	0.0897178	0.104098	0.276005	0.246442	1.74314	1.73578	1.11602	21.3251	6.04716	30.5494	2.02503	23.0587	6.97182	4.61337	2.55762	4.51627	60.4993	34.9844	8.9155	25.7358	55.0089	3.98938	6.35035
				0.601408	0.359363	0.54543	0.0515317	0.143993	0.467648	0.202701	1.77067	1.38619	0.753831	14.9229	4.17216	36.5507	2.5448	21.1436	9.38526	6.39739	2.74316	3.29326	53.7744	42.9323	5.67917	24.0646	54.4725	10.9661	4.81769
				0.567862	0.430923	0.604173	0.0569794	0.130943	0.372003	0.22137	1.81639	1.62929	1.14724	16.2644	6.88889	33.1784	2.14399	21.2848	8.3697	6.18144	2.91192	3.89703	57.0306	39.0723	7.36978	26.1528	54.4958	5.93267	6.04891
	Drought	no SA-primed		0.561727	0.238179	0.662337	0.0350758	0.18093	0.343479	0.198953	1.65895	2.5092	2.49184	11.9734	8.27314	32.7246	2.76968	21.1193	8.95816	6.44806	2.73263	3.39458	66.18	30.4254	7.07394	31.6544	52.7071	3.18127	5.3833
				0.518543	0.308595	0.72839	0.0315335	0.0855628	0.422733	0.153604	1.73042	1.41001	0.604528	15.274	5.37291	33.0988	1.37512	22.6431	9.13329	7.93569	3.15258	3.6776	51.5589	44.7635	6.93612	34.2428	49.4168	3.30634	6.09795
				0.506953	0.253142	0.787162	0.0248025	0.0778214	0.397366	0.172002	1.7123	1.66277	0.8556	13.1753	6.51519	33.866	1.36827	21.6108	9.57973	8.41191	2.95448	2.92606	52.6684	44.4055	7.00455	34.6727	49.5978	3.51259	5.21232
				0.529075	0.266638	0.725963	0.0304706	0.114771	0.387859	0.174853	1.70056	1.86066	1.31732	13.4742	6.72041	33.2298	1.83769	21.7911	9.22373	7.59855	2.94656	3.33275	56.8025	39.8648	7.00487	33.5233	50.5739	3.3334	5.56452
		SA-primed		0.544095	0.413973	0.753627	0.0391648	0.0903358	0.399957	0.174644	1.8717	1.36206	0.738315	19.1371	5.45624	32.0008	1.34402	21.6544	9.55011	6.29168	2.46521	3.65567	54.3535	41.9908	7.83198	32.0893	50.3909	4.16417	5.52372
				0.573157	0.413362	0.786842	0.0492093	0.115901	0.373667	0.185923	1.9249	1.6263	0.98177	15.7481	6.23105	33.4063	1.64119	21.0139	9.67021	6.91491	2.76632	5.07817	54.8208	40.1011	7.37606	33.6023	48.5576	4.36759	6.09647
				0.524513	0.373933	0.827615	0.0381748	0.0919598	0.387342	0.214015	1.93304	1.72165	1.08405	14.9687	6.36898	32.4548	2.47106	22.0162	9.36826	6.54164	3.00466	3.66599	60.295	36.039	7.40623	37.7428	46.5186	3.005	5.32734
				0.547255	0.400423	0.789361	0.042183	0.0993989	0.386989	0.191527	1.90988	1.57	0.934711	16.618	6.01876	32.6206	1.81876	21.5615	9.52953	6.58274	2.7454	4.13327	56.4898	39.3769	7.53809	34.4781	48.489	3.84558	5.64918

## Sheet: Data in Figure 8
the water loss rate
DLS	plants from no SA-primed under normal condition			plants from no SA-primed under drought condition			plants from SA-primed under normal condition			plants from SA-primed under drought condition
	Repeat 1	Repeat 2	Repeat 3	Repeat 1	Repeat 2	Repeat 3	Repeat 1	Repeat 2	Repeat 3	Repeat 1	Repeat 2	Repeat 3
15 minutes	0.0792839	0.0396694	0.0876827	0.110795	0.115625	0.038835	0.0616438	0.0890208	0.183024	0.0594406	0.0701107	0.0549273
30 minutes	0.13555	0.0876033	0.11691	0.147727	0.1375	0.0970874	0.086758	0.106825	0.212202	0.0891608	0.097786	0.0807754
45 minutes	0.181586	0.11405	0.152401	0.164773	0.146875	0.12945	0.116438	0.133531	0.228117	0.125874	0.125461	0.108239
60 minutes	0.225064	0.138843	0.177453	0.196023	0.175	0.15534	0.157534	0.175074	0.251989	0.155594	0.171587	0.137318
75 minutes	0.2711	0.190083	0.189979	0.238636	0.2	0.213592	0.226027	0.210682	0.286472	0.181818	0.230627	0.177706
90 minutes	0.299233	0.22314	0.22547	0.284091	0.246875	0.236246	0.26484	0.249258	0.310345	0.223776	0.273063	0.198708
105 minutes	0.332481	0.247934	0.263048	0.292614	0.278125	0.275081	0.312785	0.290801	0.34748	0.256993	0.315498	0.227787
120 minutes	0.375959	0.292562	0.306889	0.338068	0.325	0.346278	0.369863	0.35905	0.38992	0.304196	0.363469	0.266559
135 minutes	0.404092	0.323967	0.336117	0.363636	0.35625	0.368932	0.442922	0.373887	0.416446	0.344406	0.398524	0.300485
150 minutes	0.424552	0.34876	0.359081	0.383523	0.38125	0.394822	0.474886	0.448071	0.442971	0.368881	0.326199	0.373344
ML8000	plants from no SA-primed under normal condition			plants from no SA-primed under drought condition			plants from SA-primed under normal condition			plants from SA-primed under drought condition
	Repeat 1	Repeat 2	Repeat 3	Repeat 1	Repeat 2	Repeat 3	Repeat 1	Repeat 2	Repeat 3	Repeat 1	Repeat 2	Repeat 3
15 minutes	0.0775194	0.131455	0.0921053	0.138686	0.141892	0.137931	0.100629	0.106796	0.110879	0.115888	0.130612	0.124051
30 minutes	0.0949612	0.150235	0.114035	0.156934	0.158784	0.163793	0.120283	0.128155	0.126569	0.134579	0.155102	0.148101
45 minutes	0.112403	0.169014	0.135965	0.175182	0.175676	0.189655	0.139937	0.149515	0.142259	0.153271	0.179592	0.172152
60 minutes	0.129845	0.187793	0.149123	0.20073	0.199324	0.215517	0.161164	0.167961	0.156904	0.170093	0.191837	0.189873
75 minutes	0.147287	0.206573	0.162281	0.226277	0.222973	0.241379	0.18239	0.186408	0.171548	0.186916	0.204082	0.207595
90 minutes	0.166667	0.2277	0.175439	0.251825	0.239865	0.271552	0.200472	0.206796	0.190377	0.201869	0.223469	0.221519
105 minutes	0.186047	0.248826	0.188596	0.277372	0.256757	0.301724	0.218553	0.227184	0.209205	0.216822	0.242857	0.235443
120 minutes	0.203488	0.267606	0.201754	0.29562	0.27027	0.327586	0.235063	0.243689	0.226987	0.229907	0.262245	0.250633
135 minutes	0.22093	0.286385	0.214912	0.313869	0.283784	0.353448	0.251572	0.260194	0.24477	0.242991	0.281633	0.265823
150 minutes	0.248062	0.236842	0.236842	0.335766	0.304054	0.37931	0.272013	0.283495	0.267782	0.259813	0.304082	0.286076
P05206	plants from no SA-primed under normal condition			plants from no SA-primed under drought condition			plants from SA-primed under normal condition			plants from SA-primed under drought condition
	Repeat 1	Repeat 2	Repeat 3	Repeat 1	Repeat 2	Repeat 3	Repeat 1	Repeat 2	Repeat 3	Repeat 1	Repeat 2	Repeat 3
15 minutes	0.0558292	0.0775	0.0843806	0.0682731	0.0837209	0.0866142	0.137597	0.0203666	0.0519802	0.0521327	0.0422535	0.0511182
30 minutes	0.0952381	0.12	0.114901	0.160643	0.176744	0.141732	0.176357	0.0631365	0.0866337	0.123223	0.101408	0.111821
45 minutes	0.1133	0.135	0.123878	0.172691	0.190698	0.153543	0.184109	0.0753564	0.0891089	0.146919	0.115493	0.13099
60 minutes	0.128079	0.15	0.136445	0.192771	0.218605	0.15748	0.209302	0.0997963	0.111386	0.172986	0.129577	0.15655
75 minutes	0.139573	0.1725	0.154399	0.220884	0.232558	0.181102	0.224806	0.1222	0.138614	0.201422	0.149296	0.191693
90 minutes	0.159278	0.2025	0.168761	0.253012	0.27907	0.19685	0.24031	0.138493	0.155941	0.234597	0.169014	0.233227
105 minutes	0.182266	0.2275	0.18851	0.261044	0.293023	0.220472	0.267442	0.162933	0.180693	0.258294	0.185915	0.239617
120 minutes	0.198686	0.2525	0.202873	0.285141	0.325581	0.232283	0.286822	0.185336	0.20297	0.281991	0.202817	0.271565
135 minutes	0.220033	0.2775	0.231598	0.309237	0.348837	0.255906	0.312016	0.211813	0.227723	0.305687	0.225352	0.303514
150 minutes	0.239737	0.31	0.251346	0.333333	0.395349	0.267717	0.337209	0.238289	0.25495	0.334123	0.250704	0.332268
chlorophyll extraction rate
	the water loss rate
DLS	plants from no SA-primed under normal condition			plants from no SA-primed under drought condition			plants from SA-primed under normal condition			plants from SA-primed under drought condition
20	10.2038	13.153	8.2376	10.569	11.4157	8.89322	7.12734	8.26525	10.8356	8.91047	6.7295	11.5422
60	15.7957	17.2744	22.3262	19.7616	19.3314	16.5616	18.6473	18.5696	14.2597	10.2498	11.8335	14.2383
120	21.3875	23.3272	19.5841	26.6477	25.5383	22.0316	21.193	21.7194	23.0586	14.3136	15.4236	19.3051
180	26.4138	26.5778	24.3116	32.6619	31.4636	27.5288	27.0111	25.4304	29.9441	17.5153	21.0839	24.7399
ML8000	plants from no SA-primed under normal condition			plants from no SA-primed under drought condition			plants from SA-primed under normal condition			plants from SA-primed under drought condition
	1	2	3	1	2	3	1	2	3	1	2	3
20	13.8858	5.85847	7.8484	10.3598	12.3805	10.7303	4.26261	5.92891	5.60325	9.21474	13.4928	8.44688
60	20.7354	20.8979	15.1546	16.3894	18.3942	17.4972	7.33766	8.89451	8.79913	15.2458	19.6044	13.3027
120	26.0195	32.3495	26.5018	23.281	25.5583	24.3777	11.0693	12.756	12.2732	20.6219	26.13	18.644
180	31.39	49.2262	38.3936	29.3876	31.2387	31.031	14.7165	16.8602	16.3024	25.998	31.7359	22.3855
P05206	plants from no SA-primed under normal condition			plants from no SA-primed under drought condition			plants from SA-primed under normal condition			plants from SA-primed under drought condition
	1	2	3	1	2	3	1	2	3	1	2	3
20	11.619	9.83383	9.78698	11.2517	14.3253	11.2517	13.508	12.0435	10.6661	10.0551	8.00236	5.97318
60	15.7178	12.9451	13.7438	16.0295	19.8137	16.0295	14.9224	18.4099	15.0934	13.6704	10.1326	8.26759
120	20.6173	16.7285	16.6103	20.4968	20.4968	20.4968	16.3368	20.2856	18.1424	18.2167	13.6407	11.8438
180	26.4651	23.003	20.5185	24.6536	24.4237	24.6536	21.0405	25.2657	23.4024	21.3078	15.9692	15.2534

## Sheet: Data in Table 1
				Height	Biomass	chlorophyll content	Relative water content	malondialdehyde	Proline content	alkane	primary alcohol	aldehyde	α-amyrin	lanosterol	other alcohol	uknown component	total wax	C25alkane	C26alkane	C27alkane	C28alkane	C29alkane	C30alkane	C31alkane	C32alkane	C33alkane	C34alkane	C26alcohol	C27alcohol	C28alcohol	C26aldehyde	C27aldehyde	C28aldehyde	C29aldehyde	C30aldehyde
P05206	Normal	no SA-primed	Repeat 1	68.25	2.277	31.6	82.82	5.334	37.403	0.499027	0.245382	0.761283	0.0425891	0.065051	0.303113	0.152159	1.56958	1.55319	0.771914	17.0663	5.14219	33.7762	2.18005	21.9808	8.88095	5.99612	2.65232	6.364	58.6498	34.9862	7.55306	26.6614	57.5962	3.11261	5.07673
			Repeat 2	68.25	2.733	27.3	82.493	6.48	38.974	0.608652	0.402686	0.507627	0.0623344	0.0928711	0.338471	0.164882	1.56887	1.15893	0.595881	23.9638	5.04696	29.9673	1.38519	20.7576	8.5094	5.82153	2.79334	6.9403	51.5075	41.5522	6.65031	24.085	57.8354	6.48873	4.94058
			Repeat 3	68.25	2.815	33.6	82.615	6.133	39.366	0.56303	0.368002	0.585488	0.0667319	0.097968	0.357973	0.173834	1.65	1.37981	0.68413	17.3593	4.79608	32.2838	1.3898	21.5102	10.1533	6.74136	3.70218	8.90653	56.7728	34.3207	5.83126	28.4236	53.9653	5.69443	6.0854
			Repeat 4	68.25	2.61	30.8	83.429	5.982	38.581	0.556903	0.33869	0.618133	0.0572185	0.0852967	0.333186	0.163625	1.59615	1.36397	0.683975	19.4632	4.99508	32.0091	1.65168	21.4162	9.1812	6.18634	3.04928	7.40361	55.6434	36.953	6.67821	26.39	56.4656	5.09859	5.36757
		SA-primed	Repeat 1	67.75	2.541	29.5	92.093	10.627	57.823	0.550932	0.331636	0.841979	0.0296887	0.144737	0.372356	0.214968	1.93537	1.76589	1.57187	12.5451	10.4474	32.435	1.86215	19.6521	8.75202	7.53356	3.43497	3.88156	56.8182	39.3002	7.51469	28.658	54.006	2.84259	6.97871
			Repeat 2	67.75	3.106	32.9	92.227	12.413	57.823	0.551245	0.60177	0.425111	0.0897178	0.104098	0.276005	0.246442	1.74314	1.73578	1.11602	21.3251	6.04716	30.5494	2.02503	23.0587	6.97182	4.61337	2.55762	4.51627	60.4993	34.9844	8.9155	25.7358	55.0089	3.98938	6.35035
			Repeat 3	67.75	2.529	26.9	92.019	13.307	57.43	0.601408	0.359363	0.54543	0.0515317	0.143993	0.467648	0.202701	1.77067	1.38619	0.753831	14.9229	4.17216	36.5507	2.5448	21.1436	9.38526	6.39739	2.74316	3.29326	53.7744	42.9323	5.67917	24.0646	54.4725	10.9661	4.81769
			Repeat 4	67.75	2.651	30.1	92.112	14.2	57.692	0.567862	0.430923	0.604173	0.0569794	0.130943	0.372003	0.22137	1.81639	1.62929	1.14724	16.2644	6.88889	33.1784	2.14399	21.2848	8.3697	6.18144	2.91192	3.89703	57.0306	39.0723	7.36978	26.1528	54.4958	5.93267	6.04891
	Drought	no SA-primed	Repeat 1	54.75	1.317	42	81.023	11.479	58.215	0.561727	0.238179	0.662337	0.0350758	0.18093	0.343479	0.198953	1.65895	2.5092	2.49184	11.9734	8.27314	32.7246	2.76968	21.1193	8.95816	6.44806	2.73263	3.39458	66.18	30.4254	7.07394	31.6544	52.7071	3.18127	5.3833
			Repeat 2	54.75	1.261	40.5	81.893	10.02	53.503	0.518543	0.308595	0.72839	0.0315335	0.0855628	0.422733	0.153604	1.73042	1.41001	0.604528	15.274	5.37291	33.0988	1.37512	22.6431	9.13329	7.93569	3.15258	3.6776	51.5589	44.7635	6.93612	34.2428	49.4168	3.30634	6.09795
			Repeat 3	54.75	1.123	39.3	81.532	12.927	51.54	0.506953	0.253142	0.787162	0.0248025	0.0778214	0.397366	0.172002	1.7123	1.66277	0.8556	13.1753	6.51519	33.866	1.36827	21.6108	9.57973	8.41191	2.95448	2.92606	52.6684	44.4055	7.00455	34.6727	49.5978	3.51259	5.21232
			Repeat 4	54.75	1.229	40.6	81.532	10.121	54.419	0.529075	0.266638	0.725963	0.0304706	0.114771	0.387859	0.174853	1.70056	1.86066	1.31732	13.4742	6.72041	33.2298	1.83769	21.7911	9.22373	7.59855	2.94656	3.33275	56.8025	39.8648	7.00487	33.5233	50.5739	3.3334	5.56452
		SA-primed	Repeat 1	59	1.465	32.3	90.98	13.271	88.845	0.544095	0.413973	0.753627	0.0391648	0.0903358	0.399957	0.174644	1.8717	1.36206	0.738315	19.1371	5.45624	32.0008	1.34402	21.6544	9.55011	6.29168	2.46521	3.65567	54.3535	41.9908	7.83198	32.0893	50.3909	4.16417	5.52372
			Repeat 2	59	1.499	38.5	90.083	11.249	95.349	0.573157	0.413362	0.786842	0.0492093	0.115901	0.373667	0.185923	1.9249	1.6263	0.98177	15.7481	6.23105	33.4063	1.64119	21.0139	9.67021	6.91491	2.76632	5.07817	54.8208	40.1011	7.37606	33.6023	48.5576	4.36759	6.09647
			Repeat 3	59	1.596	37.9	91.919	12.212	94.735	0.524513	0.373933	0.827615	0.0381748	0.0919598	0.387342	0.214015	1.93304	1.72165	1.08405	14.9687	6.36898	32.4548	2.47106	22.0162	9.36826	6.54164	3.00466	3.66599	60.295	36.039	7.40623	37.7428	46.5186	3.005	5.32734
			Repeat 4	59	1.769	42.2	90.854	12.26	92.976	0.547255	0.400423	0.789361	0.042183	0.0993989	0.386989	0.191527	1.90988	1.57	0.934711	16.618	6.01876	32.6206	1.81876	21.5615	9.52953	6.58274	2.7454	4.13327	56.4898	39.3769	7.53809	34.4781	48.489	3.84558	5.64918

## Sheet: Data in Supplementary Figure 1
				total wax content
DLS	Normal	no SA-primed	Repeat 1	1.6485
			Repeat 2	1.70004
			Repeat 3	1.7128
		H2O-primed	Repeat 1	1.66667
			Repeat 2	1.76322
			Repeat 3	1.58304
		SA-primed	Repeat 1	1.93878
			Repeat 2	1.92126
			Repeat 3	1.89402
	Drought	no SA-primed	Repeat 1	1.77241
			Repeat 2	1.78567
			Repeat 3	1.74729
		H2O-primed	Repeat 1	1.73883
			Repeat 2	1.79363
			Repeat 3	1.73299
		SA-primed	Repeat 1	1.87394
			Repeat 2	1.93439
			Repeat 3	2.19785
ML8000	Normal	no SA-primed	Repeat 1	1.67477
			Repeat 2	1.61315
			Repeat 3	1.64396
		H2O-primed	Repeat 1	1.6733
			Repeat 2	1.59334
			Repeat 3	1.62686
		SA-primed	Repeat 1	1.90032
			Repeat 2	1.88148
			Repeat 3	1.8924
	Drought	no SA-primed	Repeat 1	1.67639
			Repeat 2	1.61519
			Repeat 3	1.64579
		H2O-primed	Repeat 1	1.69704
			Repeat 2	1.53558
			Repeat 3	1.61494
		SA-primed	Repeat 1	2.27701
			Repeat 2	2.07327
			Repeat 3	2.23253
P05206	Normal	no SA-primed	Repeat 1	2.0686
			Repeat 2	2.17752
			Repeat 3	2.21303
		H2O-primed	Repeat 1	2.26806
			Repeat 2	2.26221
			Repeat 3	2.29837
		SA-primed	Repeat 1	2.4863
			Repeat 2	2.29439
			Repeat 3	2.37208
	Drought	no SA-primed	Repeat 1	2.22068
			Repeat 2	2.34896
			Repeat 3	2.31925
		H2O-primed	Repeat 1	2.38865
			Repeat 2	2.30597
			Repeat 3	2.3209
		SA-primed	Repeat 1	2.4158
			Repeat 2	2.49806
			Repeat 3	2.45755
